# Supplementary material for: Extracellular adenosine deamination primes tip organizer development in Dictyostelium
Source: eLife journal article supplement (doi:10.7554/elife.104855), 2025-03-11
Supplement: fig1-data1 [file Figure_1_Source_data_1.pdf › Figure_1_Source_data_1.pdf]

Figure 1-Source data 2\_Gel image with labelled bands

Mutant validation

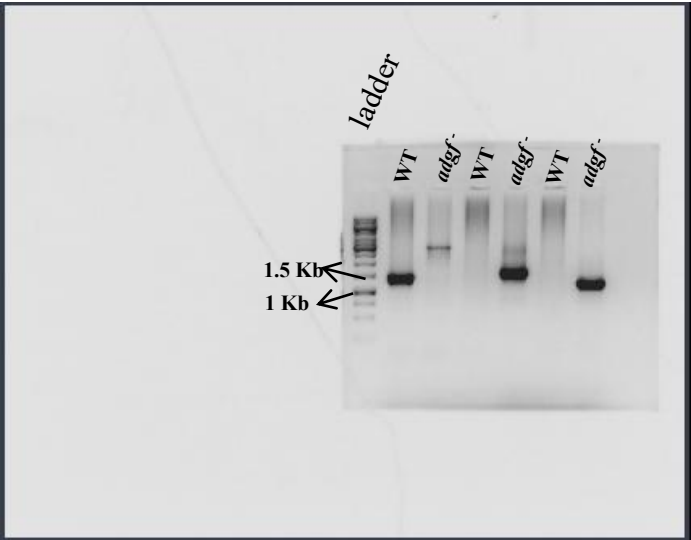

*rnIA* expression

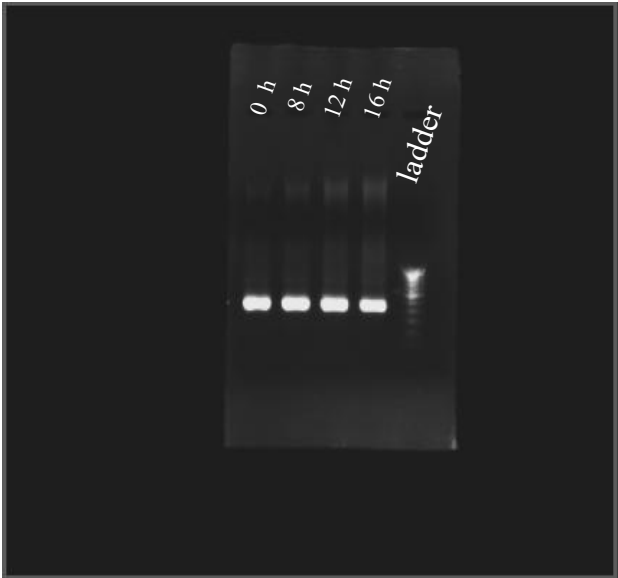

*adgf* expression

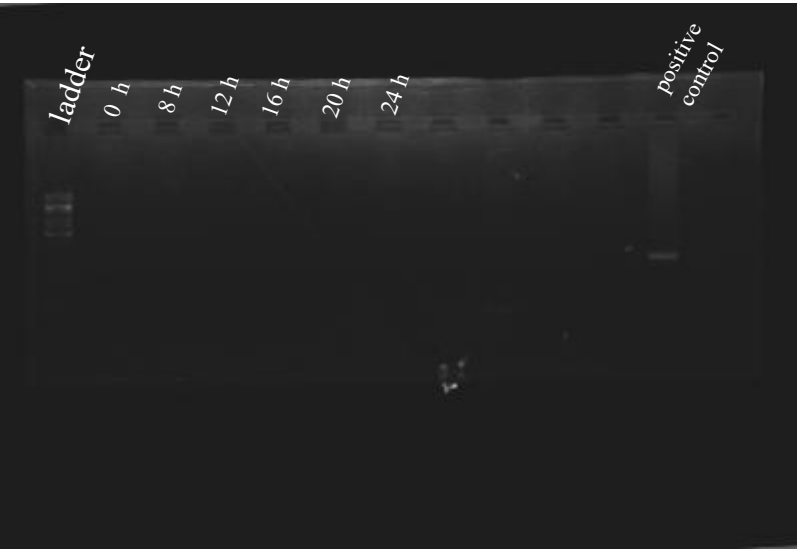

Original gels corresponding to Figure 1, panels B and C. Thermo Fisher ladders were used. The lower gel shows *adgf* expression in the *adgf*<sup>-</sup> mutant at 0 h, 8 h, 12 h, and 16 h (lanes 1–4), followed by samples from 20 h and 24 h (lanes 5–6), and a positive control (not included in the figure).
