# Supplementary material for: Extracellular adenosine deamination primes tip organizer development in Dictyostelium
Source: eLife journal article supplement (doi:10.7554/elife.104855), 2025-03-11
Supplement: fig4-data1 [file Figure_4_Source_data_1.pdf › Figure_4_Source_data_1.pdf]

Figure 4-Source data 2\_Gel image with labelled bands

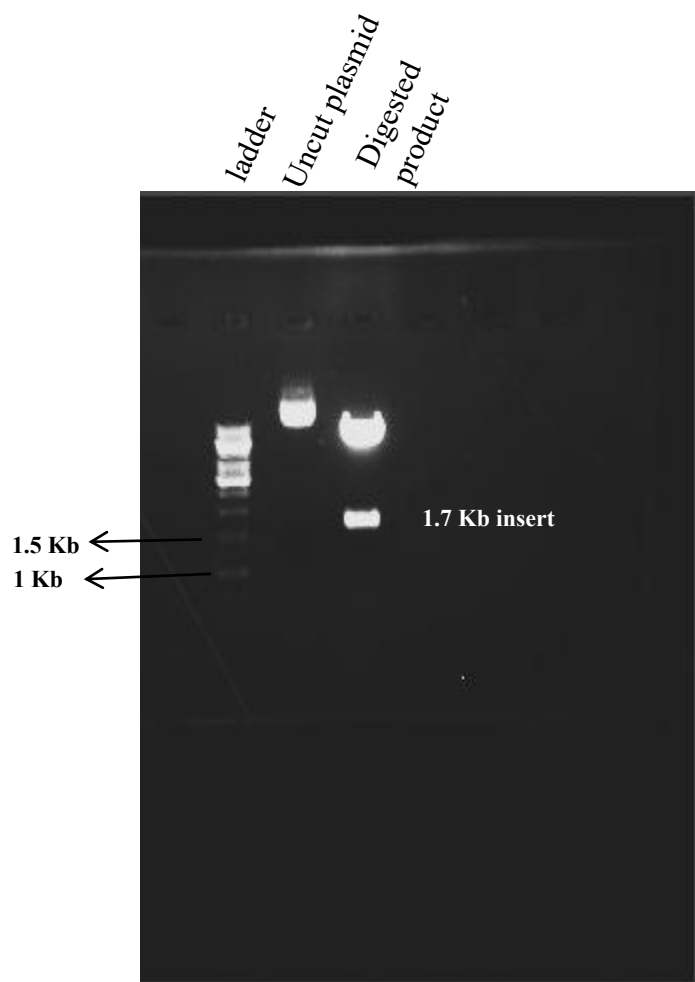

Original gel corresponding to Figure 4, panel B. Thermo Fisher ladder was used.
